# Supplementary material for: Trends and outcomes of percutaneous endoscopic gastrostomy in hospitalized patients with malignant and nonmalignant ascites: a nationwide population study
Source: PubMed Central journal article supplement — Ann Gastroenterol. 2020 Sep 16;33(6):656–60. doi: 10.20524/aog.2020.0531 (PMC7599344; doi:10.20524/aog.2020.0531), 2020-09-16
Supplement: AnnGastroenterol-33-656_Suppl1.pdf [file AnnGastroenterol-33-656_Suppl1.pdf]

## Supplementary material

### Appendix 1

| Diagnosis/procedure name      | ICD-9 code                                 |
|-------------------------------|--------------------------------------------|
| PEG                           | 43.11                                      |
| Ascites                       | 789.59, 789.51                             |
| Chronic liver disease         | 571.x, 572.x                               |
| Metastatic cancer             | 196.x, 197.x, 198.x, 199.x, 789.51, 209.7x |
| Hypertension                  | 401.x, 402.x, 403.x, 404.x, 405.x          |
| Diabetes mellitus             | 250.x                                      |
| Chronic kidney disease        | 585.x                                      |
| Congestive heart failure      | 428.x                                      |
| Peritonitis                   | 567.2x                                     |
| Local infection of PEG        | 536.41                                     |
| Mechanical dysfunction of PEG | 536.42                                     |
| Hemoperitoneum                | 568.81                                     |
| Gastric prolapse              | 530.4                                      |
| Aspiration pneumonia          | 507.0                                      |
| Esophageal perforation        | 537.89                                     |

*PEG, percutaneous endoscopic gastrostomy*
